# Supplementary material for: Development of antioxidant-rich edible active films and coatings incorporated with de-oiled ethanolic green algae extract: a candidate for prolonging the shelf life of fresh produce
Source: Royal Society of Chemistry journal article supplement (doi:10.1039/d2ra00949h), 2022-01-01
Supplement: d2ra00949h1.pdf [file d2ra00949h1.pdf]

## Electronic Supplementary Information

### Development of antioxidant-rich edible active films & coatings incorporated with de-oiled ethanolic green algae extract: a candidate for prolonging the shelf life of fresh produces

Kona Mondal,<sup>a</sup> Sayan Kumar Bhattacharjee,<sup>a</sup> Chethana Mudenur,<sup>a</sup> Tabli Ghosh,<sup>a</sup> Vaibhav V. Goud,<sup>a</sup> and  
Vimal Katiyar<sup>\*a</sup>

<sup>a</sup>Department of Chemical Engineering, Indian Institute of Technology Guwahati (IITG), Assam-781039, India,  
Corresponding author: vkatiyar@iitg.ac.in

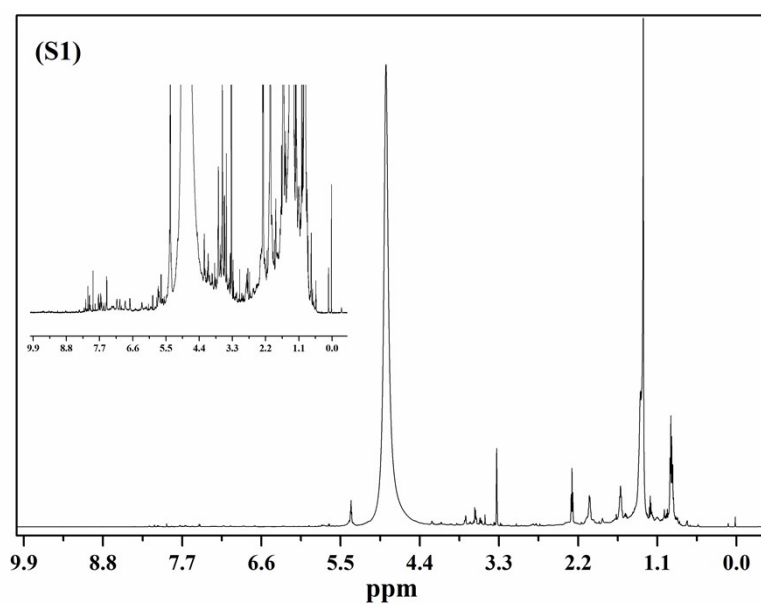

Fig. S1: <sup>1</sup>H NMR spectra of CAEE in CD<sub>3</sub>OD<sub>3</sub> solvent

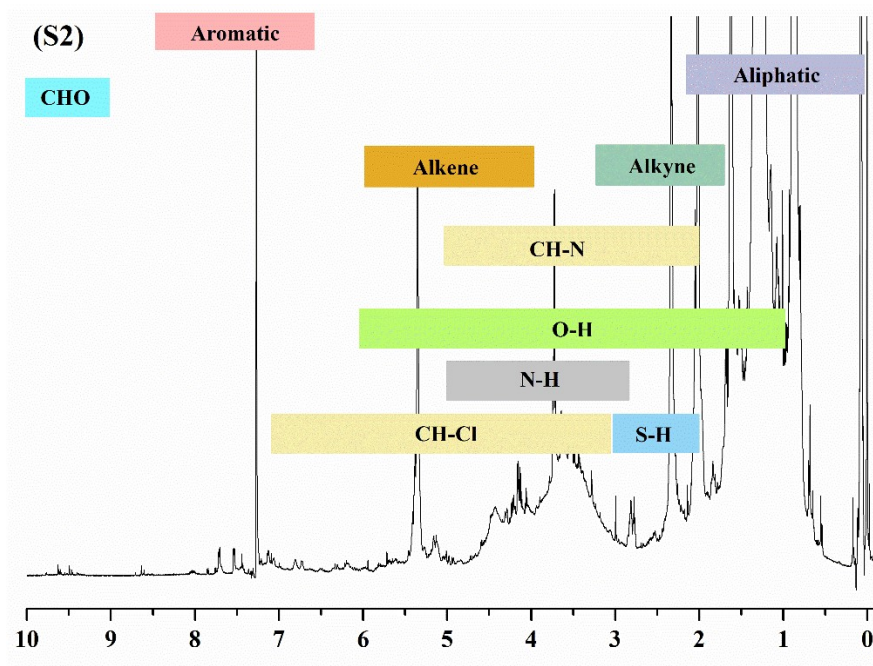

Fig. S2:  $^1\text{H}$  NMR spectrum of CAEE showing range of chemical shift

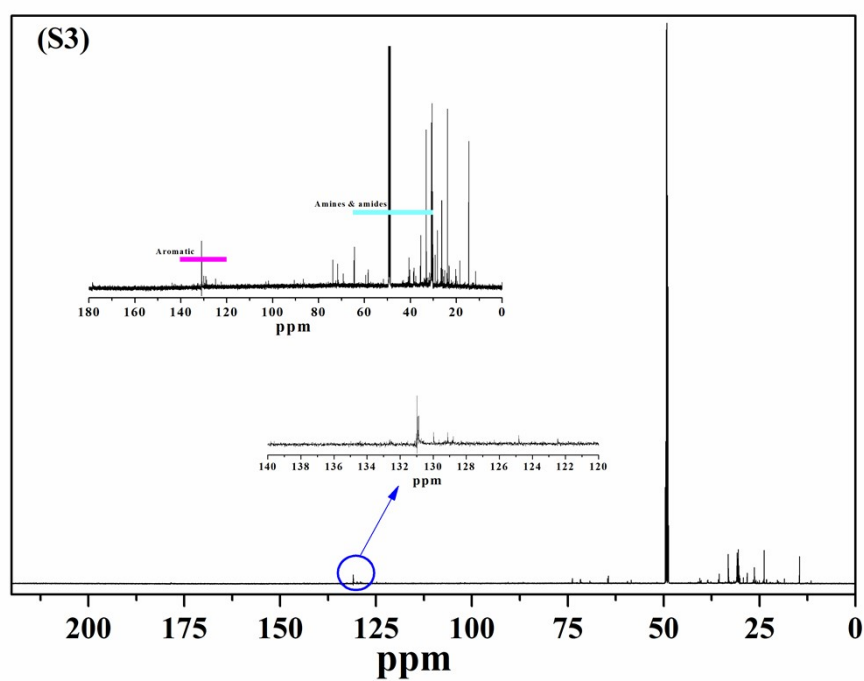

Fig. S3:  $^{13}\text{C}$  NMR spectra of CAEE in  $\text{CD}_3\text{OD}_3$  solvent

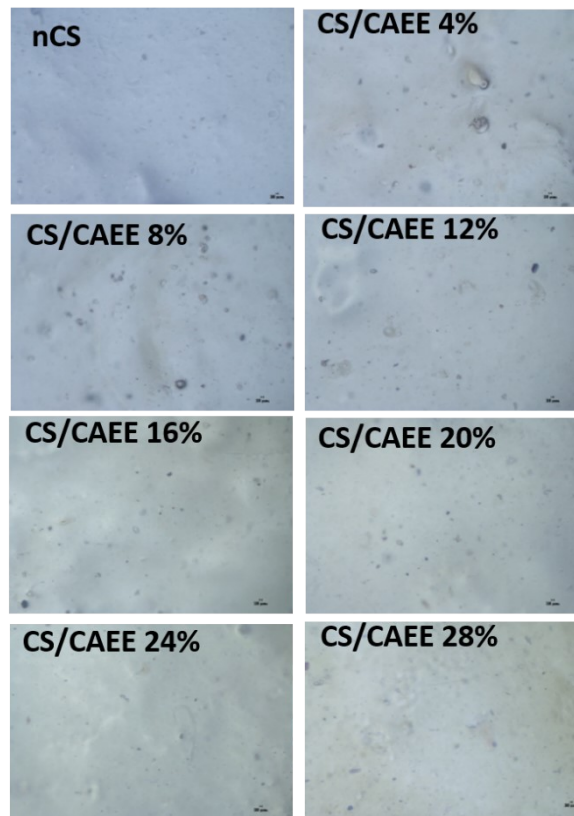

Fig. S4: Polarized optical microscopy image of developed CS/CAEE films with control

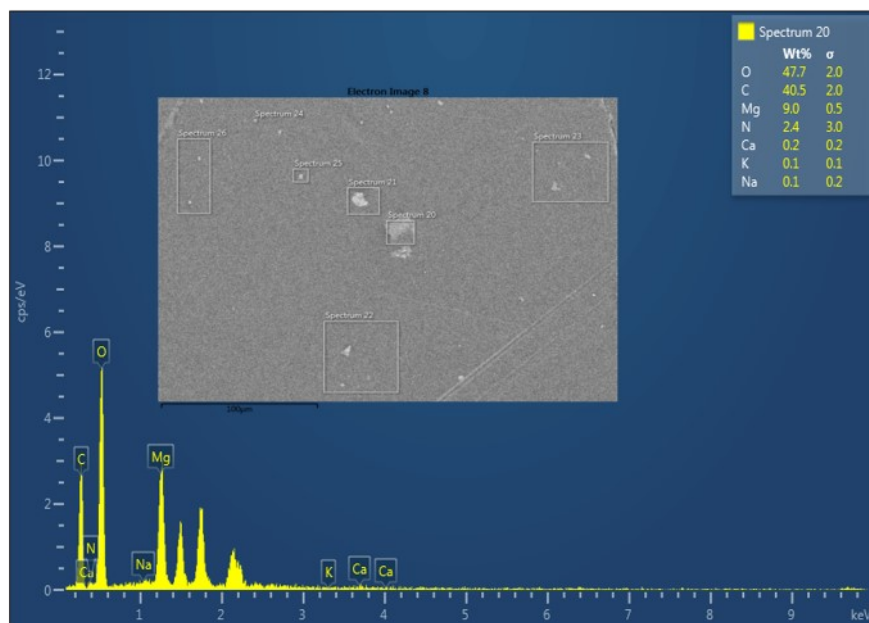

Fig. S5: Energy dispersive X-ray Microscopy image of developed CS/CAEE 28% films

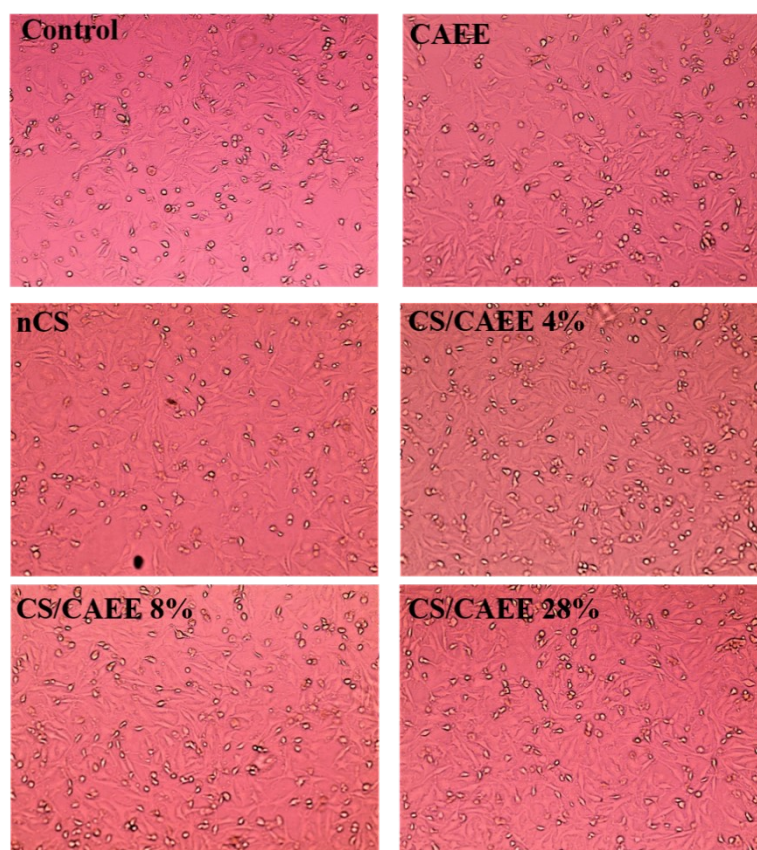

Fig. S6: BHK-21 cell proliferation on control, CAEE, nCS, CS/CAEE 4%, CS/CAEE 8%, and CS/CAEE 28%

Table S1: Color properties of developed CS/CAEE films

| Developed Films    | L*          | a*          | b*          | c*          |
|--------------------|-------------|-------------|-------------|-------------|
| <b>Control</b>     | 84.93±0.22  | -1.556±0.19 | 25.086±0.68 | 25.132±0.67 |
| <b>CS/CAEE 4%</b>  | 82.748±0.56 | -2.49±0.15  | 30.35±1.47  | 30.452±1.46 |
| <b>CS/CAEE 8%</b>  | 81.576±0.70 | -2.984±0.15 | 32.25±1.25  | 32.392±1.23 |
| <b>CS/CAEE 12%</b> | 80.54±0.46  | -3.298±0.08 | 34.354±0.50 | 34.51±0.49  |
| <b>CS/CAEE 16%</b> | 75.818±0.40 | -2.434±0.19 | 38.912±0.99 | 38.99±0.98  |
| <b>CS/CAEE 20%</b> | 75.374±0.55 | -2.252±0.31 | 40.096±1.26 | 40.164±1.24 |
| <b>CS/CAEE 24%</b> | 74.57±0.29  | -2.062±0.08 | 41.23±0.32  | 41.284±0.31 |
| <b>CS/CAEE 28%</b> | 70.524±2.22 | 0.032±0.94  | 45.162±1.45 | 45.172±1.44 |

Table S2: Degradation result of nCS and developed CS/CAEE films at 5% ( $T_{5\%}$ ) and 10% ( $T_{10\%}$ ) weight loss with first and second maximum degradation ( $T_{max}$ )

| <b>Film Sample</b> | $T_{5\%}$ (°C) | $T_{10\%}$ (°C) | First Degradation<br>( $T_{max}$ ) (°C) | Second<br>Degradation<br>( $T_{max}$ ) (°C) |
|--------------------|----------------|-----------------|-----------------------------------------|---------------------------------------------|
| <b>nCS</b>         | 71.1±0.17      | 98.4±0.23       | 75.46±0.02                              | 308.51±0.12                                 |
| <b>CS/CAEE 4%</b>  | 86.5±0.05      | 124.2±0.17      | 113.75±0.08                             | 298.39±0.21                                 |
| <b>CS/CAEE 8%</b>  | 84.4±0.03      | 120.3±0.11      | 113.75±0.16                             | 298.39±0.22                                 |
| <b>CS/CAEE 12%</b> | 87.2±0.25      | 125.9±0.12      | 113.75±0.17                             | 295.12±0.05                                 |
| <b>CS/CAEE 16%</b> | 84.4±1.05      | 118.7±1.19      | 113.75±0.16                             | 296.02±0.07                                 |
| <b>CS/CAEE 20%</b> | 77.1±1.15      | 107.4±1.07      | 76.12±0.14                              | 293.41±0.09                                 |
| <b>CS/CAEE 24%</b> | 84.4±0.05      | 113.1±0.16      | 76.12±0.06                              | 292.02±0.13                                 |
| <b>CS/CAEE 28%</b> | 109.7±0.17     | 156.8±0.07      | 106.81±0.07                             | 291.36±0.17                                 |

Table S3: Antimicrobial activity of developed coating solution

| <b>Sample</b>        | <i>Escherichia coli</i><br>(Inhibition zone diameter) (cm) | <i>Staphylococcus aureus</i><br>(Inhibition zone diameter) (cm) |
|----------------------|------------------------------------------------------------|-----------------------------------------------------------------|
| <b>Control (nCS)</b> | 0.9±0.09                                                   | 0.9±0.05                                                        |
| <b>CS/CAEE 4%</b>    | 1.2±0.14                                                   | 1.2±0.14                                                        |
| <b>CS/CAEE 28%</b>   | 1.3±0.05                                                   | 1.3±0.09                                                        |

Table S4: Color parameters ( $L^*$ ,  $a^*$  &  $b^*$ ) of coated green chilli with control during storage

| Samples                       | Color parameters | Zero (0 <sup>th</sup> ) day | Final (8 <sup>th</sup> ) day |
|-------------------------------|------------------|-----------------------------|------------------------------|
| <b>Uncoated<br/>(Control)</b> | $L^*$            | $32.69 \pm 0.12$            | $46.69 \pm 0.18$             |
|                               | $a^*$            | $-8.77 \pm 0.21$            | $4.88 \pm 0.28$              |
|                               | $b^*$            | $18.83 \pm 0.12$            | $36.44 \pm 0.23$             |
| <b>nCS</b>                    | $L^*$            | $22.17 \pm 0.17$            | $31.17 \pm 0.19$             |
|                               | $a^*$            | $-10.13 \pm 0.31$           | $-3.51 \pm 0.23$             |
|                               | $b^*$            | $22.17 \pm 0.17$            | $31.17 \pm 0.19$             |
| <b>CS/CAEE 4%</b>             | $L^*$            | $40.81 \pm 0.23$            | $41.35 \pm 0.18$             |
|                               | $a^*$            | $-11.10 \pm 0.13$           | $-7.36 \pm 0.35$             |
|                               | $b^*$            | $27.59 \pm 0.15$            | $28.82 \pm 0.27$             |
| <b>CS/CAEE 12%</b>            | $L^*$            | $38.85 \pm 0.33$            | $42.59 \pm 0.11$             |
|                               | $a^*$            | $-10.26 \pm 0.24$           | $-8.49 \pm 0.31$             |
|                               | $b^*$            | $22.93 \pm 0.11$            | $25.19 \pm 0.17$             |
| <b>CS/CAEE 20%</b>            | $L^*$            | $41.06 \pm 0.25$            | $43.79 \pm 0.11$             |
|                               | $a^*$            | $-10.23 \pm 0.34$           | $-6.67 \pm 0.19$             |
|                               | $b^*$            | $26.54 \pm 0.22$            | $27.28 \pm 0.12$             |
| <b>CS/CAEE 28%</b>            | $L^*$            | $42.45 \pm 0.36$            | $40.32 \pm 0.22$             |
|                               | $a^*$            | $-7.79 \pm 0.13$            | $-6.47 \pm 0.35$             |
|                               | $b^*$            | $27.31 \pm 0.15$            | $28.542 \pm 0.27$            |
